# Supplementary material
Source: PubMed Central journal article supplement (PMC4987724)

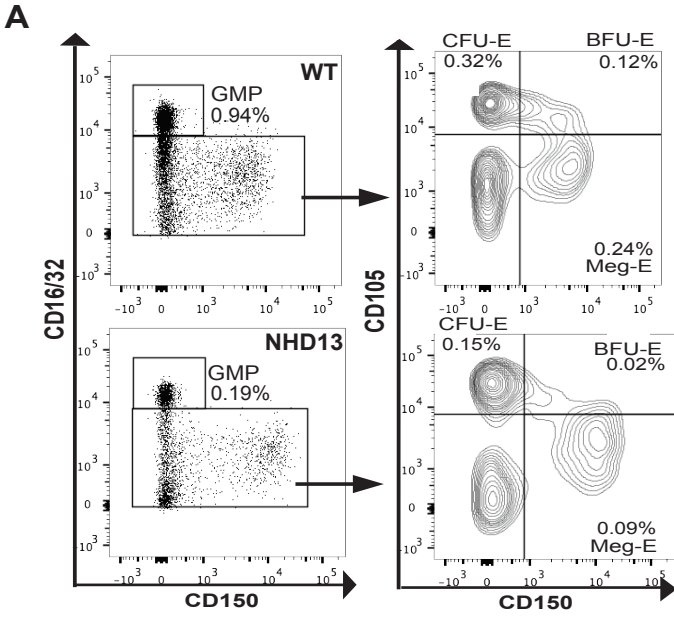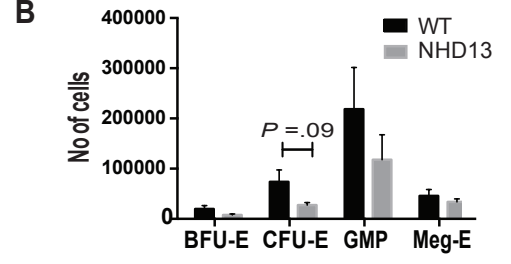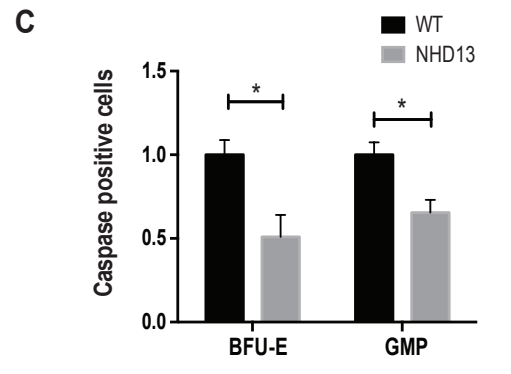

**FIGURE S1**

**A**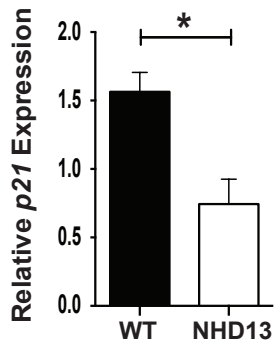**B**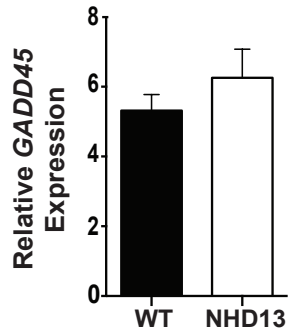**FIGURE S2**

**AML**

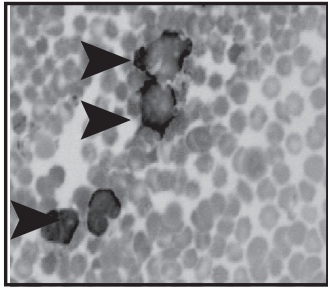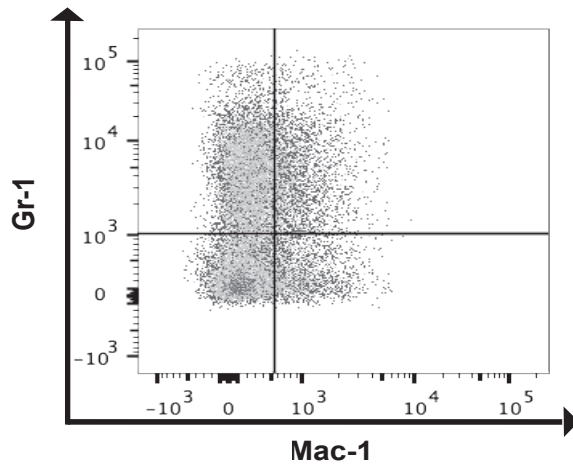

**ALL**

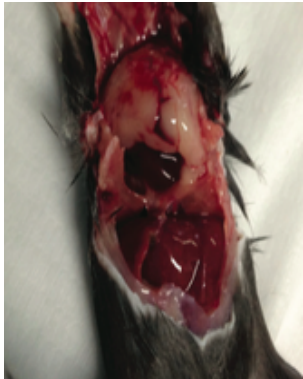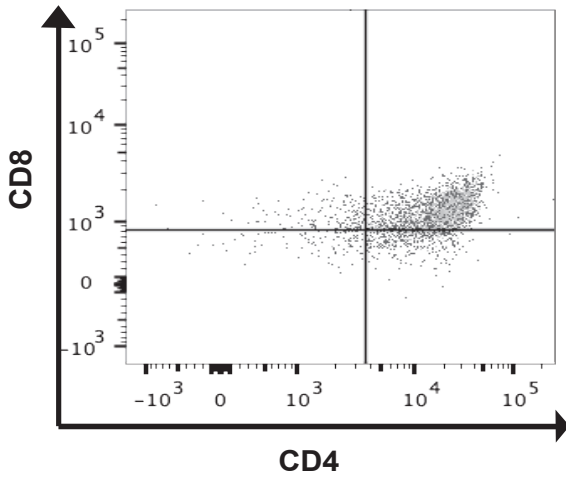

**FIGURE S3**

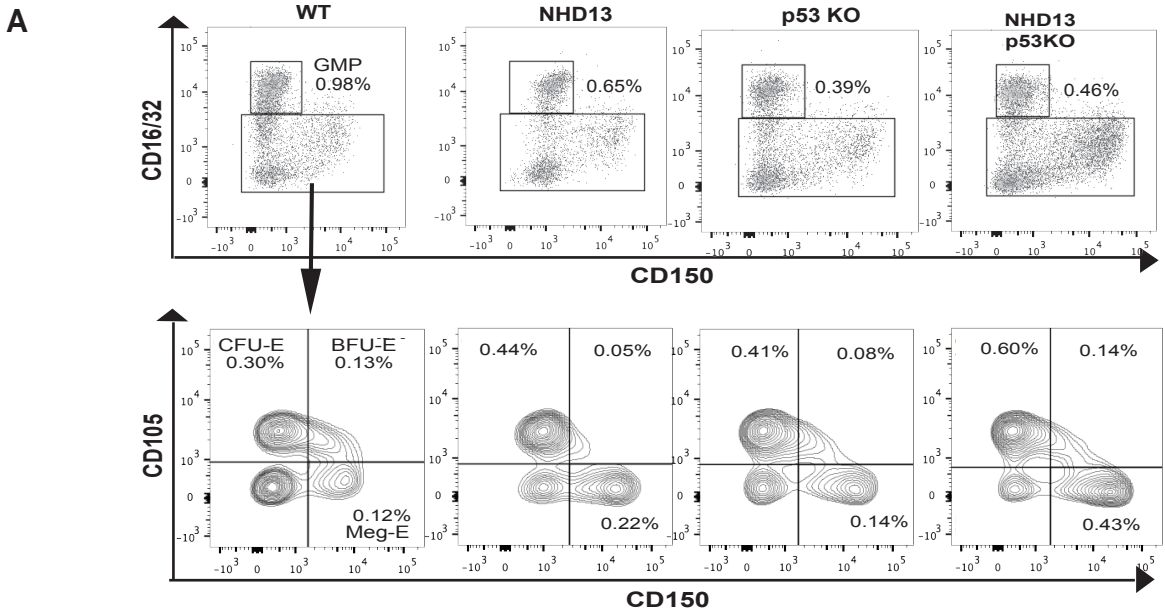

**B**

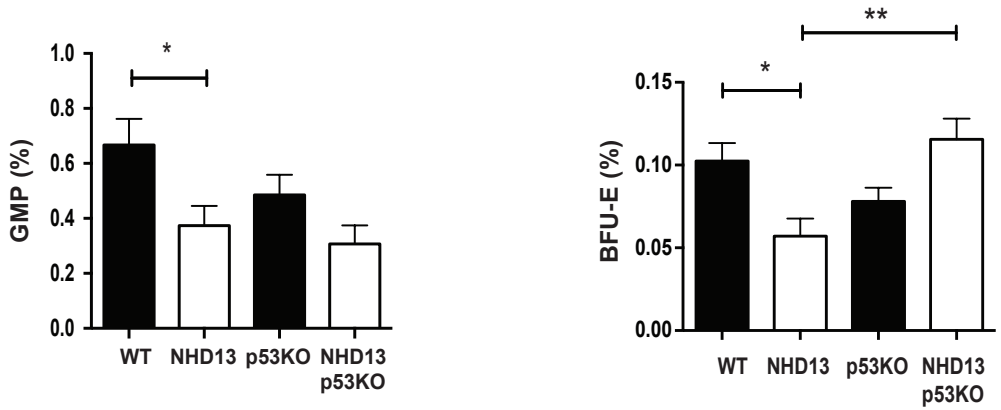

**FIGURE S4**

**A**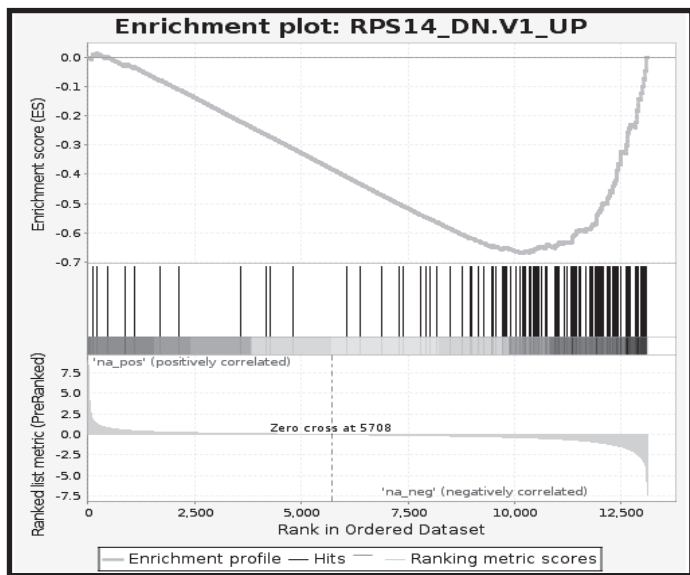**B**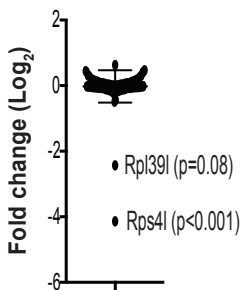**FIGURE S5**

**A**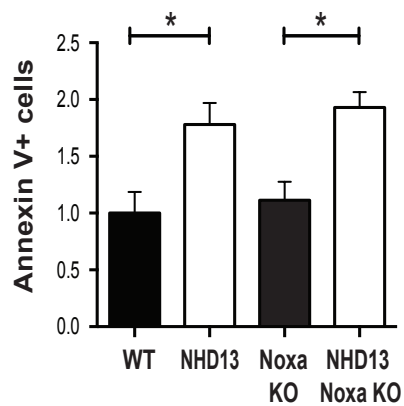**B**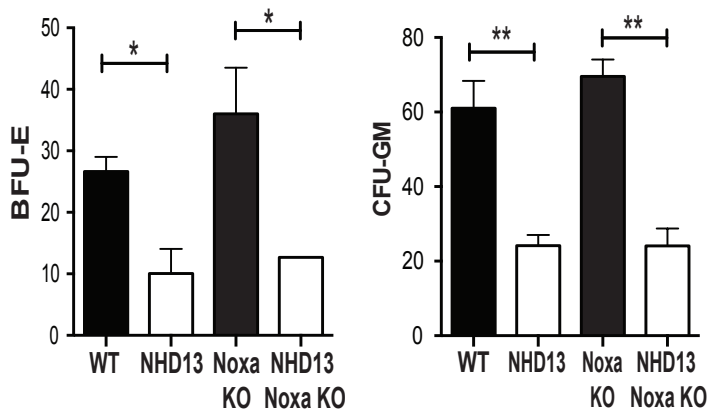**C**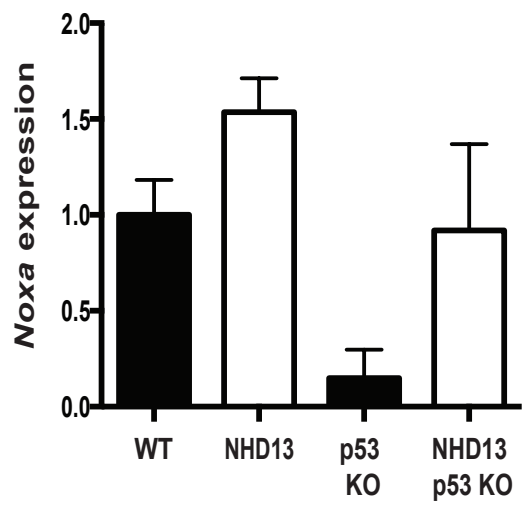**FIGURE S6**

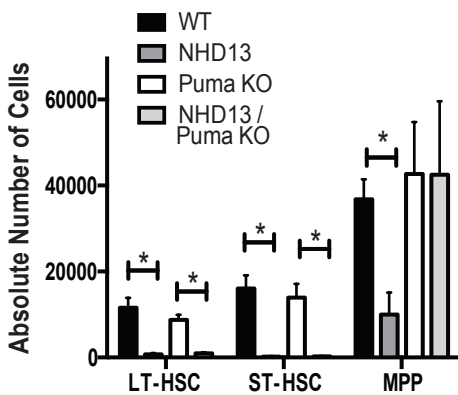

FIGURE S7

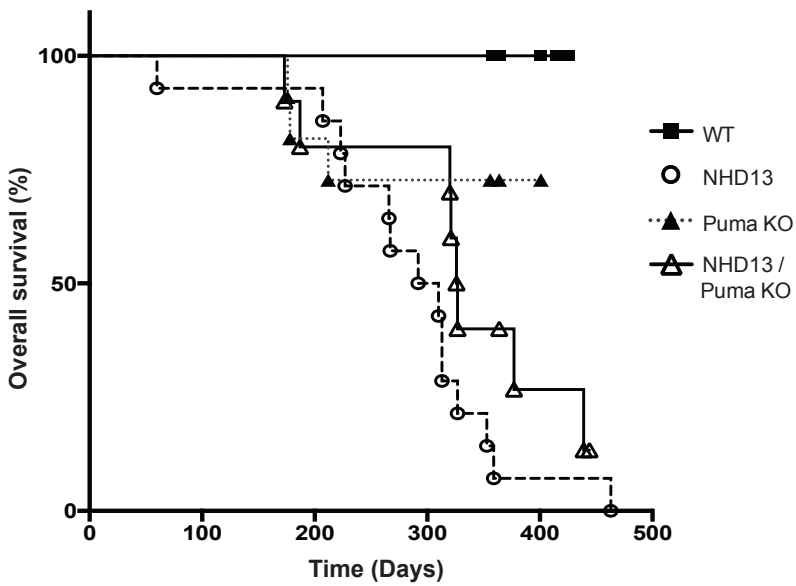

FIGURE S8

Supplement: cdd2015159x2.pdf [file cdd2015159x2.pdf]
